# Supplementary material
Source: PubMed Central journal article supplement (PMC6182119)
Supplement: supp_6.3.E360_squire-checklist.pdf [file supp_6.3.E360_squire-checklist.pdf]

**Revised Standards for Quality Improvement Reporting Excellence (SQUIRE 2.0)**  
**September 15, 2015**

| Text Section and Item Name                     | Section or Item Description                                                                                                                                                                                                                                                                                                                                                                                                                                                                                                                                                                                                                                                                                                                                                                                                                                                                                                                                                                                           |
|------------------------------------------------|-----------------------------------------------------------------------------------------------------------------------------------------------------------------------------------------------------------------------------------------------------------------------------------------------------------------------------------------------------------------------------------------------------------------------------------------------------------------------------------------------------------------------------------------------------------------------------------------------------------------------------------------------------------------------------------------------------------------------------------------------------------------------------------------------------------------------------------------------------------------------------------------------------------------------------------------------------------------------------------------------------------------------|
| <b>Notes to authors</b>                        | <ul style="list-style-type: none"> <li>• The SQUIRE guidelines provide a framework for reporting new knowledge about how to improve healthcare</li> <li>• The SQUIRE guidelines are intended for reports that describe <u>system</u> level work to improve the quality, safety, and value of healthcare, and used methods to establish that observed outcomes were due to the <u>intervention(s)</u>.</li> <li>• A range of approaches exists for improving healthcare. SQUIRE may be adapted for reporting any of these.</li> <li>• Authors should consider every SQUIRE item, but it may be inappropriate or unnecessary to include every SQUIRE element in a particular manuscript.</li> <li>• The SQUIRE Glossary contains definitions of many of the key words in SQUIRE.</li> <li>• The Explanation and Elaboration document provides specific examples of well-written SQUIRE items, and an in-depth explanation of each item.</li> <li>• Please cite SQUIRE when it is used to write a manuscript.</li> </ul> |
| <b>Title and Abstract</b>                      |                                                                                                                                                                                                                                                                                                                                                                                                                                                                                                                                                                                                                                                                                                                                                                                                                                                                                                                                                                                                                       |
| Title page<br><b>1. Title</b>                  | Indicate that the manuscript concerns an <u>initiative</u> to improve healthcare (broadly defined to include the quality, safety, effectiveness, patient-centeredness, timeliness, cost, efficiency, and equity of healthcare)                                                                                                                                                                                                                                                                                                                                                                                                                                                                                                                                                                                                                                                                                                                                                                                        |
| Abstract<br><b>2. Abstract</b>                 | <ol style="list-style-type: none"> <li>a. Provide adequate information to aid in searching and indexing</li> <li>b. Summarize all key information from various sections of the text using the abstract format of the intended publication or a structured summary such as: background, local <u>problem</u>, methods, interventions, results, conclusions</li> </ol>                                                                                                                                                                                                                                                                                                                                                                                                                                                                                                                                                                                                                                                  |
| <b>Introduction</b>                            |                                                                                                                                                                                                                                                                                                                                                                                                                                                                                                                                                                                                                                                                                                                                                                                                                                                                                                                                                                                                                       |
| Page 3<br><b>3. <u>Problem Description</u></b> | <i>Why did you start?</i><br>Nature and significance of the local <u>problem</u>                                                                                                                                                                                                                                                                                                                                                                                                                                                                                                                                                                                                                                                                                                                                                                                                                                                                                                                                      |
| Page 3<br><b>4. Available knowledge</b>        | Summary of what is currently known about the <u>problem</u> , including relevant previous studies                                                                                                                                                                                                                                                                                                                                                                                                                                                                                                                                                                                                                                                                                                                                                                                                                                                                                                                     |

|           |                                        |                                                                                                                                                                                                                                                                                                                                                                                                                                                                                                                                                                                                          |
|-----------|----------------------------------------|----------------------------------------------------------------------------------------------------------------------------------------------------------------------------------------------------------------------------------------------------------------------------------------------------------------------------------------------------------------------------------------------------------------------------------------------------------------------------------------------------------------------------------------------------------------------------------------------------------|
| Page 3    | 5. <u>Rationale</u>                    | Informal or formal frameworks, models, concepts, and/or <u>theories</u> used to explain the <u>problem</u> , any reasons or <u>assumptions</u> that were used to develop the <u>intervention(s)</u> , and reasons why the <u>intervention(s)</u> was expected to work                                                                                                                                                                                                                                                                                                                                    |
| Page 3    | 6. <b>Specific aims</b>                | Purpose of the project and of this report                                                                                                                                                                                                                                                                                                                                                                                                                                                                                                                                                                |
|           | <b>Methods</b>                         | <i>What did you do?</i>                                                                                                                                                                                                                                                                                                                                                                                                                                                                                                                                                                                  |
| Page 4-6  | 7. <u>Context</u>                      | Contextual elements considered important at the outset of introducing the <u>intervention(s)</u>                                                                                                                                                                                                                                                                                                                                                                                                                                                                                                         |
| Page 4-6  | 8. <u>Intervention(s)</u>              | a. Description of the <u>intervention(s)</u> in sufficient detail that others could reproduce it<br>b. Specifics of the team involved in the work                                                                                                                                                                                                                                                                                                                                                                                                                                                        |
| Page 6-7  | 9. <b>Study of the Intervention(s)</b> | a. Approach chosen for assessing the impact of the <u>intervention(s)</u><br>b. Approach used to establish whether the observed outcomes were due to the <u>intervention(s)</u>                                                                                                                                                                                                                                                                                                                                                                                                                          |
| Page 6-7  | 10. <b>Measures</b>                    | a. Measures chosen for studying <u>processes</u> and outcomes of the <u>intervention(s)</u> , including rationale for choosing them, their operational definitions, and their validity and reliability<br>b. Description of the approach to the ongoing assessment of contextual elements that contributed to the success, failure, efficiency, and cost<br>c. Methods employed for assessing completeness and accuracy of data                                                                                                                                                                          |
| Page 6-7  | 11. <b>Analysis</b>                    | a. Qualitative and quantitative methods used to draw <u>inferences</u> from the data<br>b. Methods for understanding variation within the data, including the effects of time as a variable                                                                                                                                                                                                                                                                                                                                                                                                              |
| Page 4-7  | 12. <b>Ethical Considerations</b>      | <u>Ethical aspects</u> of implementing and studying the <u>intervention(s)</u> and how they were addressed, including, but not limited to, formal ethics review and potential conflict(s) of interest                                                                                                                                                                                                                                                                                                                                                                                                    |
|           | <b>Results</b>                         | <i>What did you find?</i>                                                                                                                                                                                                                                                                                                                                                                                                                                                                                                                                                                                |
| Page 7    | 13. <b>Results</b>                     | a. Initial steps of the <u>intervention(s)</u> and their evolution over time (e.g., time-line diagram, flow chart, or table), including modifications made to the intervention during the project<br>b. Details of the <u>process</u> measures and outcome<br>c. Contextual elements that interacted with the <u>intervention(s)</u><br>d. Observed associations between outcomes, interventions, and relevant contextual elements<br>e. Unintended consequences such as unexpected benefits, problems, failures, or costs associated with the <u>intervention(s)</u> .<br>f. Details about missing data |
|           | <b>Discussion</b>                      | <i>What does it mean?</i>                                                                                                                                                                                                                                                                                                                                                                                                                                                                                                                                                                                |
| Page 8-10 | 14. <b>Summary</b>                     | a. Key findings, including relevance to the <u>rationale</u> and specific aims<br>b. Particular strengths of the project                                                                                                                                                                                                                                                                                                                                                                                                                                                                                 |

|                          |                           |                                                                                                                                                                                                                                                                                                                                                                                                                                                                                                                           |
|--------------------------|---------------------------|---------------------------------------------------------------------------------------------------------------------------------------------------------------------------------------------------------------------------------------------------------------------------------------------------------------------------------------------------------------------------------------------------------------------------------------------------------------------------------------------------------------------------|
| Page 8-10                | <b>15. Interpretation</b> | <ul style="list-style-type: none"> <li>a. Nature of the association between the <a href="#">intervention(s)</a> and the outcomes</li> <li>b. Comparison of results with findings from other publications</li> <li>c. Impact of the project on people and <a href="#">systems</a></li> <li>d. Reasons for any differences between observed and anticipated outcomes, including the influence of <a href="#">context</a></li> <li>e. Costs and strategic trade-offs, including <a href="#">opportunity costs</a></li> </ul> |
| Page 8-10                | <b>16. Limitations</b>    | <ul style="list-style-type: none"> <li>a. Limits to the <a href="#">generalizability</a> of the work</li> <li>b. Factors that might have limited <a href="#">internal validity</a> such as confounding, bias, or imprecision in the design, methods, measurement, or analysis</li> <li>c. Efforts made to minimize and adjust for limitations</li> </ul>                                                                                                                                                                  |
| Page 8-10                | <b>17. Conclusions</b>    | <ul style="list-style-type: none"> <li>a. Usefulness of the work</li> <li>b. Sustainability</li> <li>c. Potential for spread to other <a href="#">contexts</a></li> <li>d. Implications for practice and for further study in the field</li> <li>e. Suggested next steps</li> </ul>                                                                                                                                                                                                                                       |
| <b>Other information</b> |                           |                                                                                                                                                                                                                                                                                                                                                                                                                                                                                                                           |
| Page 11                  | <b>18. Funding</b>        | Sources of funding that supported this work. Role, if any, of the funding organization in the design, implementation, interpretation, and reporting                                                                                                                                                                                                                                                                                                                                                                       |
